# Supplementary material
Source: PubMed Central journal article supplement (PMC7919065)
Supplement: NIHMS1547840-supplement-2.pdf [file NIHMS1547840-supplement-2.pdf]

**Supplemental Table S2.** Image features that are significantly associated with patient overall survival outcome in univariate survival analysis in the National Lung Screening Trial (NLST) dataset. Features are dichotomized by the median value. P values are calculated using Ward test. CI, confidence interval; HR, hazard ratio.

| <b>Features (high vs. low)</b>                    | <b>HR (95% CI)</b> | <b>p value</b> |
|---------------------------------------------------|--------------------|----------------|
| Number of stromal cell – stromal cell connections | 0.32 (0.16 – 0.63) | 0.0011         |
| Number of karyorrhexis – karyorrhexis connections | 2.54 (1.32 – 4.91) | 0.0055         |
| Stroma nuclei density                             | 0.41 (0.21 – 0.80) | 0.0088         |
| Karyorrhexis density                              | 2.27 (1.19 – 4.33) | 0.013          |
| Number of red blood cell-karyorrhexis connections | 1.98 (1.05 – 3.74) | 0.035          |
