# Supplementary material
Source: PubMed Central journal article supplement (PMC7919065)

**Supplemental Figure S5** Validation of lymphocyte detection results in Supplemental Figure 4. (A) Detected lymphocytes from H&E stained images, (B) CD3 IHC stained image, (C) DAB channel of CD3 IHC staining, (D) Overlapping detected lymphocytes by a Mask R-CNN model from H&E stained images with DAB channel of CD3 IHC staining.

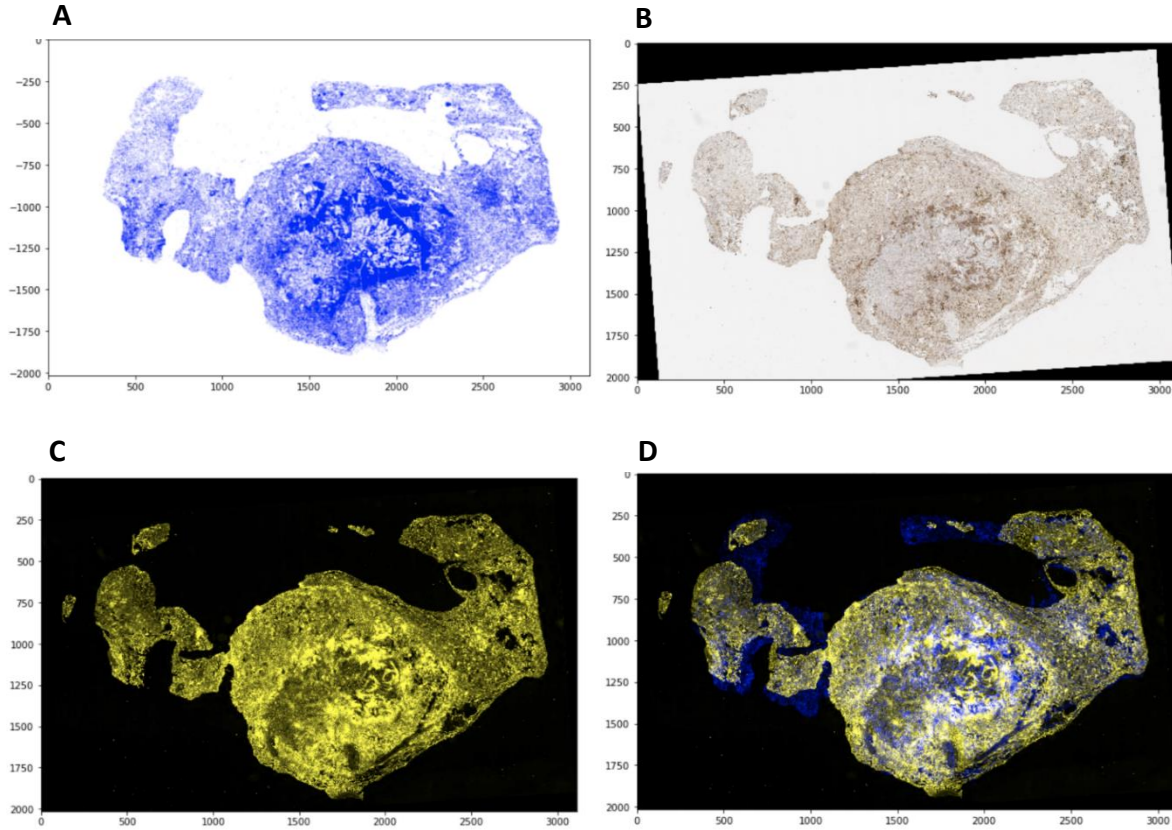

Supplement: NIHMS1547840-supplement-8.pdf [file NIHMS1547840-supplement-8.pdf]
