# Supplementary material
Source: PubMed Central journal article supplement (PMC7919065)

**Supplemental Figure S6.** Validation of macrophage detection results in Supplemental Figure 4. (A) Detected macrophages from H&E stained images, (B) CD68 IHC stained image, (C) DAB channel of CD68 IHC staining, (D) Overlapping detected macrophages by Mask R-CNN model from H&E stained images with DAB channel of CD68 IHC staining.

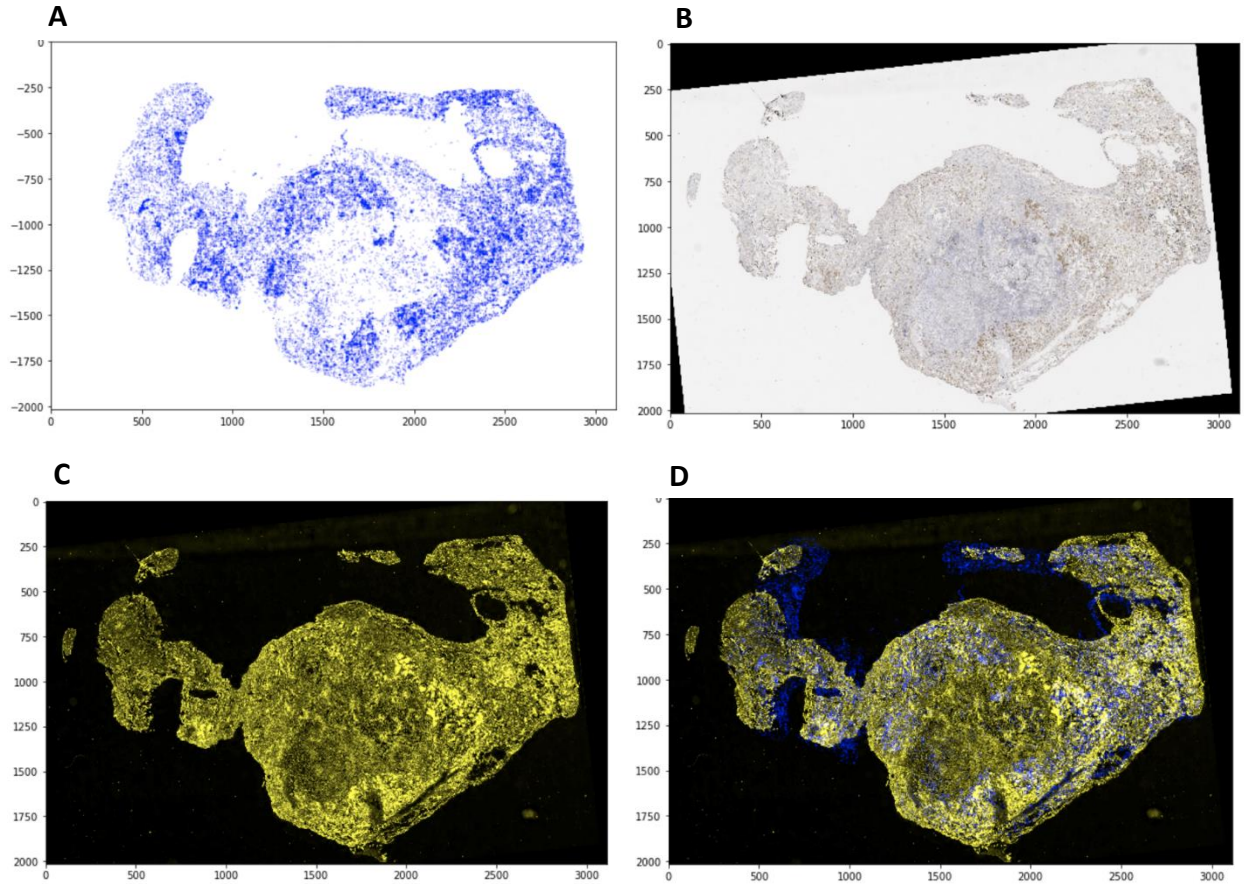

Supplement: NIHMS1547840-supplement-9.pdf [file NIHMS1547840-supplement-9.pdf]
