# Supplementary material
Source: PubMed Central journal article supplement (PMC7919065)

**Supplemental Figure S7** Illustration of Delaunay triangle construction. **(A)** Nuclei segmentation results using deep learning. Centroids of detected nuclei are marked in white. **(B)** A Delaunay triangle graph is constructed using nuclei centroids as vertices. To remove edge effect, when extracting graph properties, only edges with both ends within the solid gray square ( $976 \times 976$  pixels) are counted. Dotted gray square ( $1024 \times 1024$  pixels) plots the boundary of input image patch. Green, tumor nuclei; red, stroma nuclei; blue, lymphocyte nuclei; yellow, macrophage.

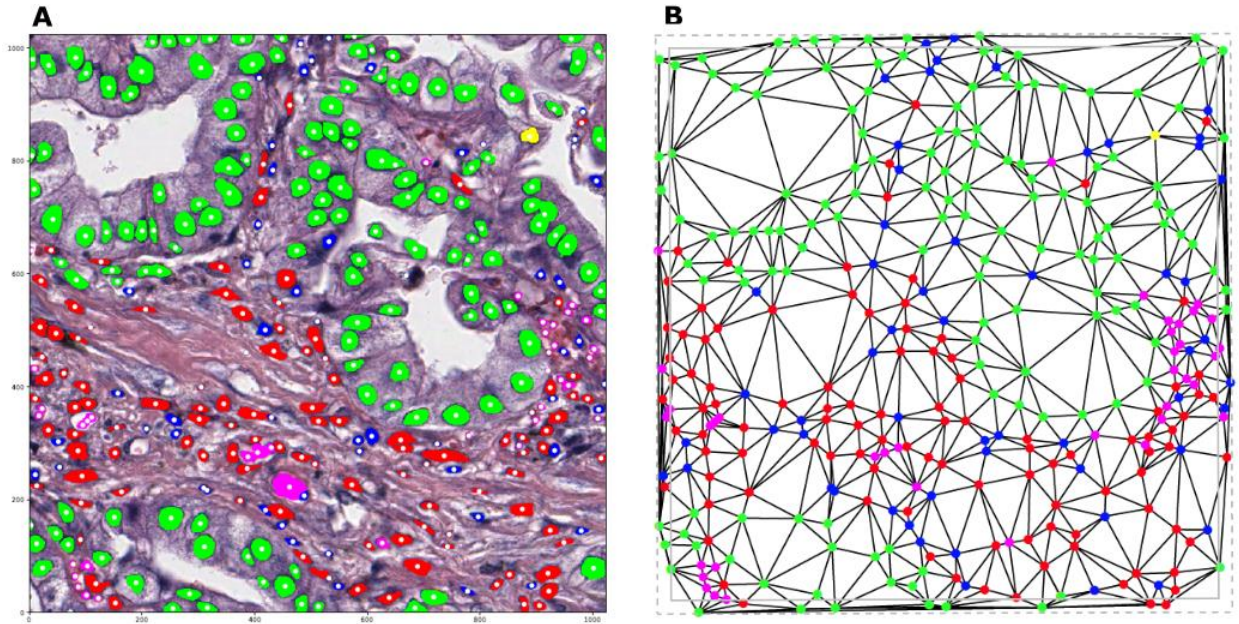

Supplement: NIHMS1547840-supplement-10.pdf [file NIHMS1547840-supplement-10.pdf]
