# Supplementary material
Source: PubMed Central journal article supplement (PMC7919065)
Supplement: NIHMS1547840-supplement-12.pdf [file NIHMS1547840-supplement-12.pdf]

**Supplemental Figure S9** Example of gene set enrichment analysis (GSEA) result correlating mRNA expression with image-derived stroma cell number and lymphocyte number, while patient IDs are randomly shuffled twice.

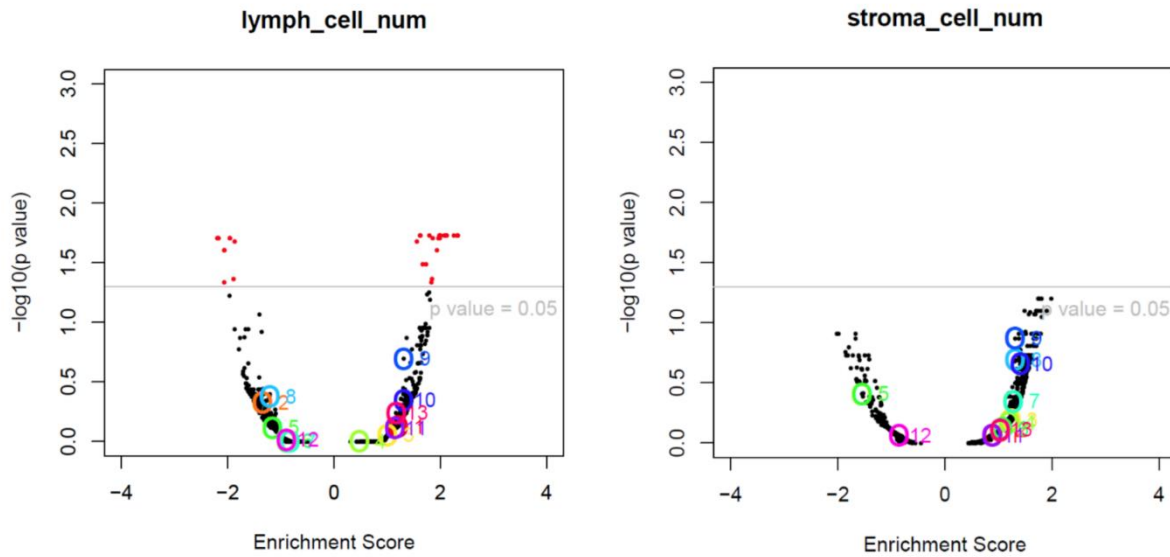

### Reactome

- 1. Pyrimidine biosynthesis
- 2. tRNA aminoacylation
- 3. Purine metabolism
- 4. Glycolysis
- 5. Pantose phosphate
- 6. TCA cycle
- 7. Respiratory electron transport
- 8. Extracellular matrix organization
- 9. Cell cycle
- 10. TCR signaling
- 11. PD-1 signaling
- 12. Tryptophan catabolism
- 13. Transcriptional regulation by TP53
